# Supplementary material
Source: PubMed Central journal article supplement (PMC3793642)
Supplement: NIHMS506608-supplement-1_si_001.pdf [file NIHMS506608-supplement-1_si_001.pdf]

# A Spherical Nucleic Acids Platform Based on Self-Assembled DNA Biopolymer for High Performance Cancer Therapy

Jing Zheng<sup>†,‡</sup>, Guizhi Zhu<sup>‡</sup>, Yinhui Li<sup>†</sup>, Chunmei Li<sup>‡,‡#</sup>, Mingxu You<sup>‡</sup>, Tao Chen<sup>‡</sup>, Erqun Song<sup>‡,‡#</sup>, Ronghua Yang<sup>\*,†</sup>, and Weihong Tan<sup>\*,‡</sup>

## Supporting Materials: figures and table

**Table S1.** Oligonucleotides Used in This Work\*

| Entry                      | Sequence (5'-3')                                                                                       |
|----------------------------|--------------------------------------------------------------------------------------------------------|
| Initiator Strand           | TGCTGCTGCTGCTGCTGCACGACG AAAAAA                                                                        |
| M1                         | CGTCGTGCAGCAGCAGCAGCAACGGCTTGCTGCTGCTGCTGCTGC                                                          |
| M2                         | TGCTGCTGCTGCTGCTGCACGACGGCAGCAGCAGCAGCAGCAAGCCGT                                                       |
| M3                         | <u>GGTGGTGGTGGTTGTGGTGGTGGTGGTTTCGTCGTGCAGCAGCAGCAGCAGCA</u> ACGGCTT<br>GCTGCTGCTGCTGCTGC              |
| M3-FITC                    | <u>GGTGGTGGTGGTTGTGGTGGTGGTGGTTTCGTCGTGCAGCAGCAGCAGCAGCAACGGCTT</u><br>GCTGCTGCTGCTGCTGC-FITC          |
| M3-TMR                     | <u>GGTGGTGGTGGTTGTGGTGGTGGTGGTTTCGTCGTGCAGCAGCAGCAGCAGCAACGGCTTG</u><br>CTGCTGCTG CTGCTGC-TMR          |
| Biotin-M3-FITC             | Biotin- <u>GGTGGTGGTGGTTGTGGTGGTGGTGGTTTCGTCGTG</u> CAGCAGCAGCAGCAGCAACG<br>GCTTCTGCTGCTGCTGCTGC -FITC |
| Biotin-M3-TMR              | Biotin- <u>GGTGGTGGTGGTTGTGGTGGTGGTGGTTTCGTCGTGCAGCAGCAGCAGCAGCAACG</u><br>GCTTCTGCTGCTGC –TMR         |
| M4                         | <u>GGTGGTGGTGGTTTT</u> TGCTGCTGCTGCTGCTGCACGACGGCAGCAGCAGCAGCAGCAAGC<br>CGTTT <u>TGTGGTGGTGG</u> TGG   |
| Sgc8 capped-Strand I-FITC  | TGCTGCTGCTGCTGCTGCACGACG <u>TTTATCTAACTGCTGCGCCGCCGGGAAAATACTGTA</u><br><u>CGGTTAGA</u> -FITC          |
| Sgc8 capped-Strand II-FITC | <u>ATCTAACTGCTGCGCCGCCGGGAAAATACTGTACGGTTAGATT</u> TACGGCTTCTGCTGCTGCT<br>GCTGCTGC-FITC                |

\* The AS1411 and Sgc8 fragments are represented in underlined portions. The complementary sequences are represented in the same color.

**Table S2.** The concentrations of conjugated initiator and self-assembled M1, M2 for each size of AuNP-SNAs.

| Size(nm)    | Initiator(nM) | M1(nM)     | M2(nM)     |
|-------------|---------------|------------|------------|
| 13.4 ± 1.2  | 0.0           | 0.0        | 0.0        |
| 19.0 ± 0.4  | 9.6 ± 1.2     | 8.7± 2.4   | 6.9± 1.8   |
| 42.5 ± 0.8  | 18.9 ± 0.8    | 41.2± 3.4  | 32.1± 1.5  |
| 112.3± 2.4  | 40.8 ± 1.3    | 210.4± 4.7 | 189.3± 2.5 |
| 130.4 ± 6.8 | 78.4 ± 3.4    | 312.8± 2.8 | 295.5± 2.7 |
| 110.4 ± 4.8 | 97.6 ± 4.2    | 368.7± 2.3 | 373.5± 1.9 |

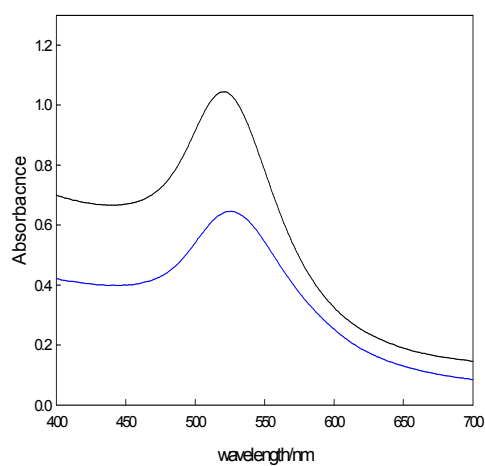

**Figure S1.** Absorption spectra of AuNPs and initiator strand before (black) and after (blue) conjugated.

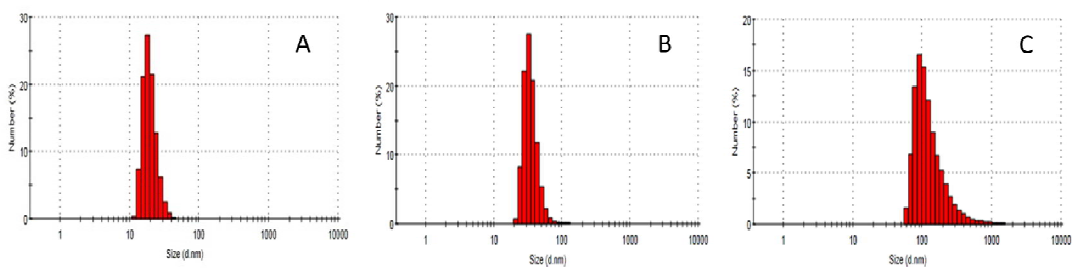

**Figure S2.** Hydrodynamic size distributions of AuNP-SNAs characterized by DLS as a function of different concentrations of initiator strand conjugated on the AuNPs. (The concentrations of initiator strand from A to C, 0,  $18.9 \pm 0.8$  and  $78.4 \pm 3.4$  nM, respectively).

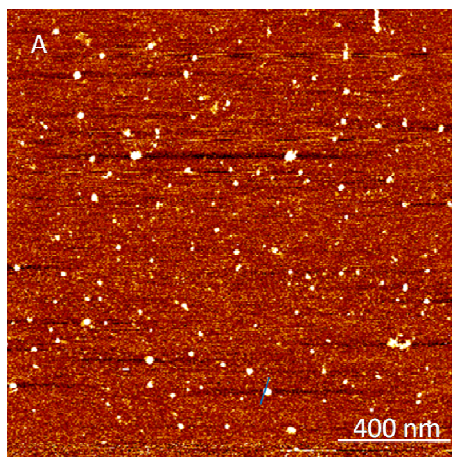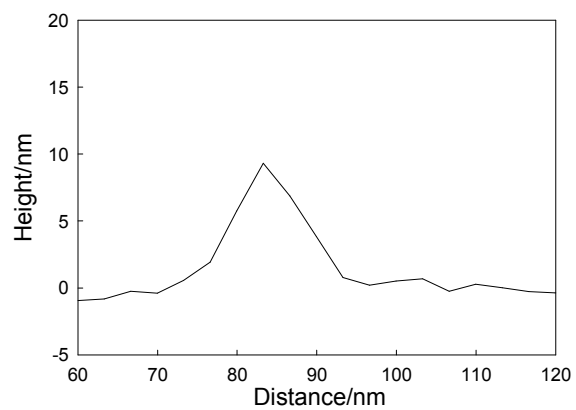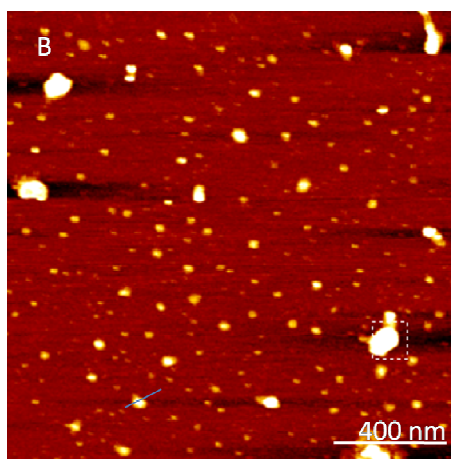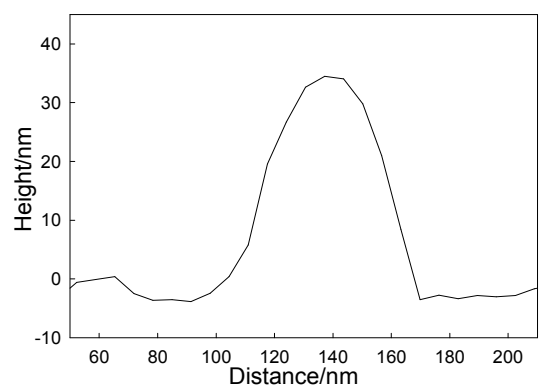

**Figure S3.** Topography AFM images and the corresponding height profiles of various sizes of AuNP-SNAs (A and B, the size are  $13.4 \pm 1.2$  and  $68.4 \pm 4.8$  nm, respectively). Scale bar: 400 nm.

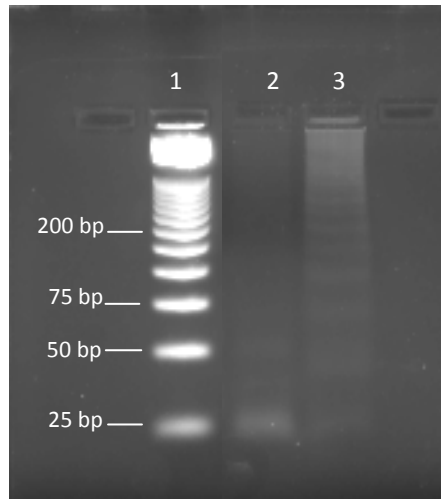

**Figure S4.** EB-stained 4% agarose gel electrophoresis image of DNA biopolymer self-assembled on the surface of the AuNPs after treatment by 10 mM DTT. Lane 1: 25 bp Marker; Lane 2: Initiator conjugated-AuNPs; Lane 3: Initiator-AuNPs+M1+M2. (Concentrations: initiator strand is 80 nM; M1 and M2 are 400 nM)

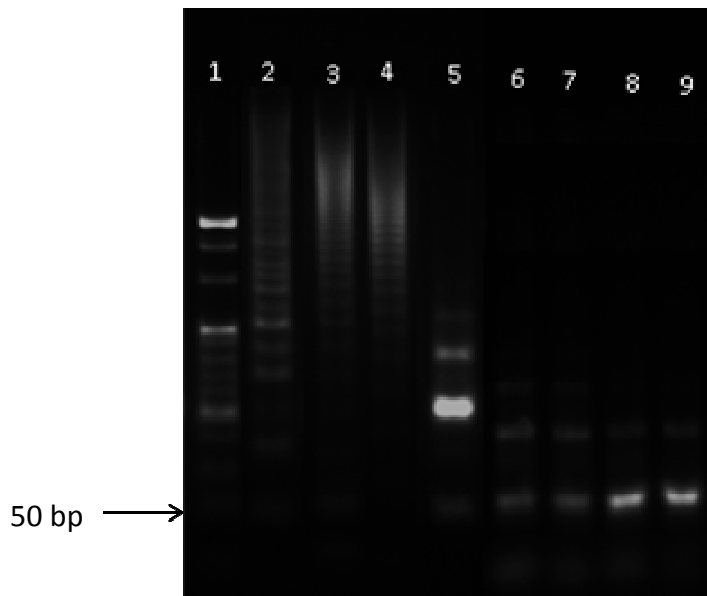

**Figure S5.** EB-stained 4% agarose gel electrophoresis image of DNA biopolymer self-assembled as a function of different location of AS1411. (Lane 2-5) Initiator strand cascade of hybridization reaction by initiator strand M2 and M3. (Lane 6-9) Initiator strand cascade of hybridization reaction by initiator strand M2 and M4. (Lane 1: 50 bp Marker; Lane 2 and 6: (Initiator strand: M2:M3/M4=0.5:10:10); Lane 3 and 7: (Initiator strand: M2: M3/M4=1:10:10); Lane 4 and 8: Initiator strand: M2: M3/M4=2:10:10); Lane 5 and 9: (Initiator strand: M2: M3/M4=5:10:10)).

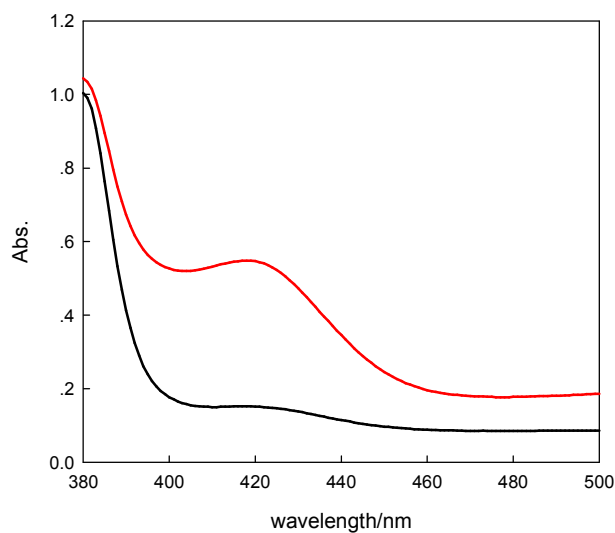

**Figure S6.** Spectroscopic analysis of the interactions between hemin and different samples: initiator conjugated-MNPs (black curve), initiator conjugated-MNPs after HCR (red curve). [Hemin]= 1  $\mu$ M, [ABTS]= 1 mM, [H<sub>2</sub>O<sub>2</sub>]= 2 mM, The concentration of MNPs is 1 nM.

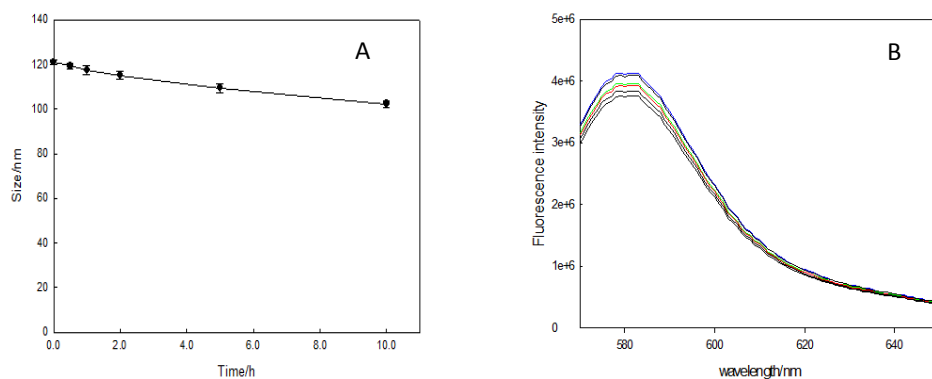

**Figure S7.** (A) Average hydrodynamic sizes of AS1411/MNP-SNAs characterized by DLS as a function of different incubation time in 3% FBS. (B) Fluorescent spectrum of TAMRA-labeled AS1411/MNP-SNAs as a function of different incubation time in 3% FBS (From top to bottom: 0, 0.5, 1.0, 2.0, 5.0 and 10.0 h). The concentration of MNPs is 5 nM.

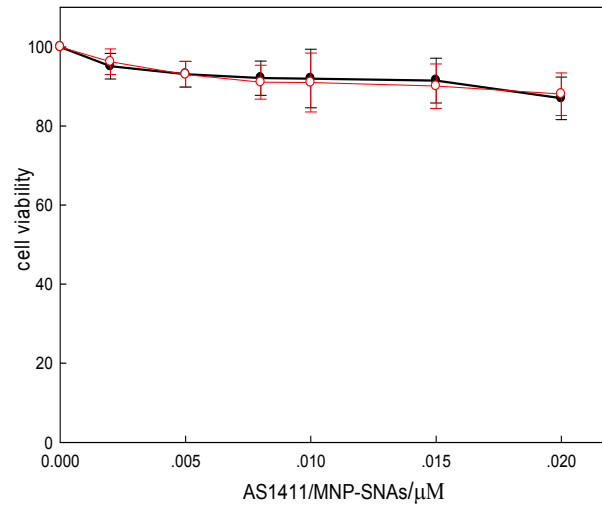

**Figure S8.** Cytotoxicity assay of (black) SKOV3 cells (target cells) and (red) HBE135 cells (control cells) treated with various concentrations of AS1411/MNP-SNAs.

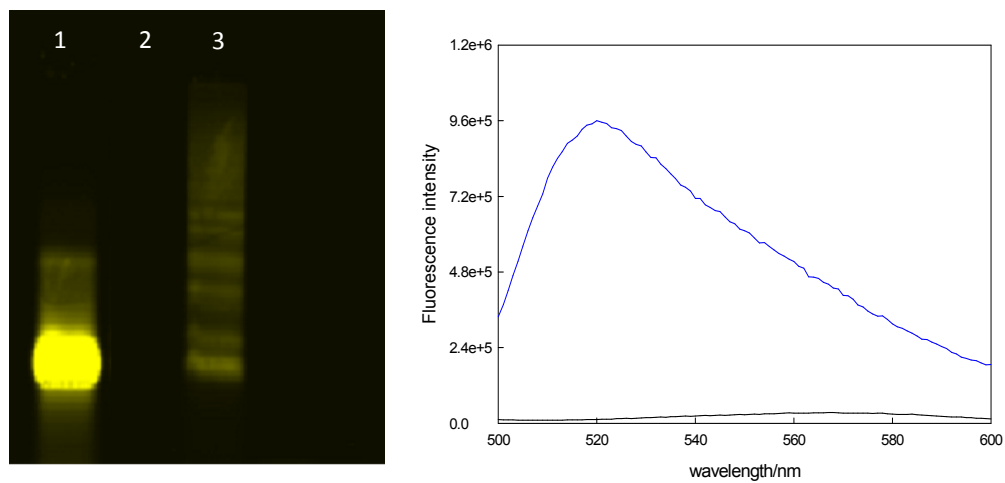

**Figure S9.** (A) 4% agarose gel electrophoresis image of DNA biopolymer before and after FITC-Sgc8 strand I capping. Lane 1: FITC-Sgc8 strand I; Lane 2: DNA biopolymer (Initiator strand: M1: M3=2:10:10); Lane 3: DNA biopolymer capped with FITC-Sgc8 strand I. (B) Fluorescent spectrum of Sgc8/MNP-SNAs before (black) and after (blue) FITC-Sgc8 strand I capping.



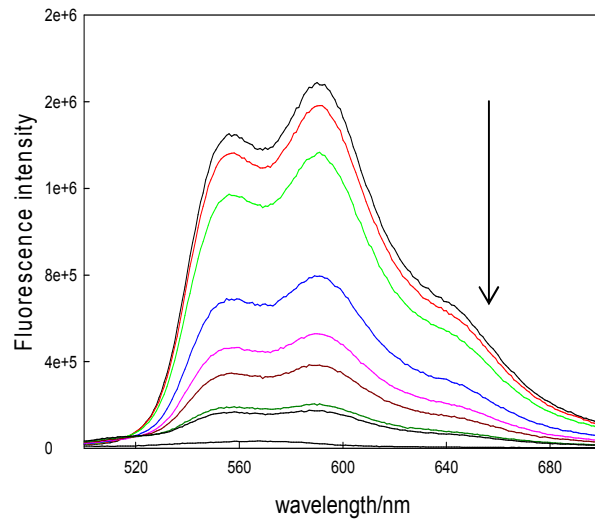

**Figure S10.** Fluorescence spectra of DOX solution (2 μM) with increasing equivalences of Sgc8/MNP-SNAs (From top to bottom: 0, 0.5, 1.0, 2.0, 3.0, 4.0, 5.0 and 10 nM).

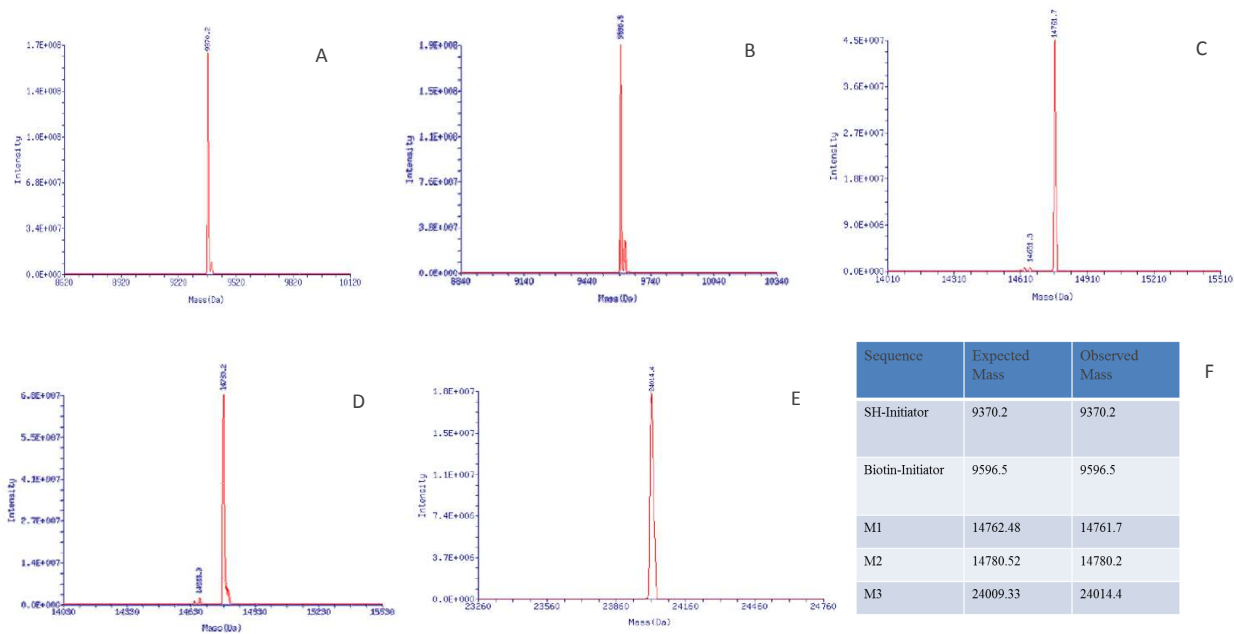

**Figure S11.** ESI Mass Spectra of SH-Initiator (A), Biotin-Initiator (B), M1(C), M2 (D) and M3 (E). Table F is the mass comparison between expected and observed value for A, B, C, D and E.
